# Supplementary material for: Defining conditions for effective interdisciplinary care team communication in an open surgical intensive care unit: a qualitative study
Source: HighWire-hosted journal article supplement (doi:10.1136/bmjopen-2023-075470), 2023-12-01
Supplement: bmjopen-2023-075470supp001_data_supplement.pdf [file bmjopen-2023-075470supp001_data_supplement.pdf]

**Supplementary File 1: Qualitative Interview Guide for Assessing Conditions for Effective Communication Amongst Interdisciplinary Teams in Surgical Intensive Care Units**

1. Interviewee starts off with personal story about team-team communication.
2. Could you please describe your role in the ICU?
3. Could you please tell me about a time you communicated something you felt was important about a patient plan? How did that go?
4. Could you please tell me about a time you had something you felt was important to communicate about a patient plan, but decided not to share?
5. What happens if there's a disagreement with the patient plan?
